# Supplementary material for: Numerical modelling of 137Cs content in the pelagic species of the Japanese Pacific coast following the Fukushima Dai-ichi Nuclear Power Plant accident using a size-structured food-web model
Source: PLOS journal article supplement (doi:10.1371/journal.pone.0212616), 2019-03-13
Supplement: S1 (10.1371/journal.pone.0212616.s001) [file journal.pone.0212616.s001]

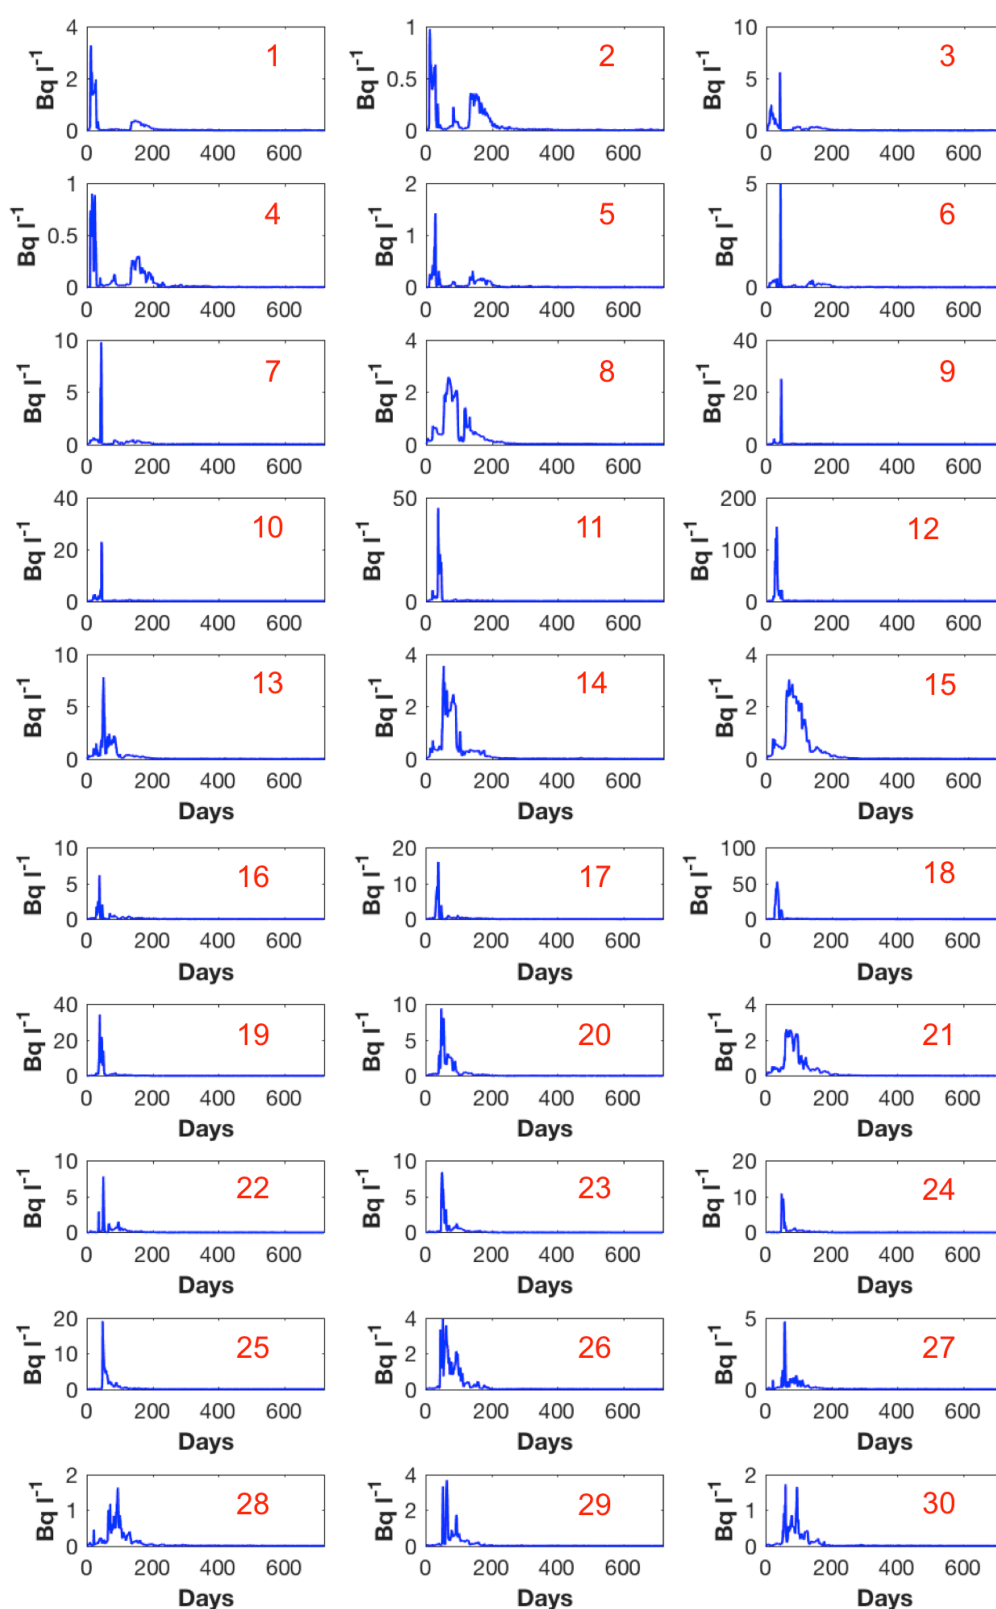

**S1 Figure:** Two years time series of  $^{137}\text{Cs}$  concentrations in the 30 sites considered in this study.
